# Supplementary material
Source: PubMed Central journal article supplement (PMC7171288)
Supplement: ntz035_suppl_supplementary_materials.pdf [file ntz035_suppl_supplementary_materials.pdf]

**ONLINE SUPPLEMENTARY MATERIAL**

## **Appendix 1: Methodology for recruiting adolescents (Wave 2)**

### *Sampling and recruitment*

Youth, ages 13 to 17, were recruited from the adult random digit dial (RDD) frames if the household had an eligible adolescent and provided parental or guardian consent. To supplement the adolescent sample, additional interviews were recruited from an electronic white page (EWP) frame that targeted households with teens. Counties with higher prevalence of smoking and poverty were oversampled. To maintain independence between the sampling frames, the targeted sample excluded numbers from the adult frame. Interviews were conducted in both English and Spanish. Adolescents were offered \$40 for their participation.

### *Data collection*

The youth sample resulted in 975 completed interviews, took an average of 23 minutes to complete, yielded an overall weighted response rate of 32.8% (American Association for Public Opinion Research Response Rate 4), and was conducted between August 17, 2016 and May 14, 2017. It followed the same field procedures as the Wave 2 adult survey with the exception that minors needed parental consent to participate. RDD households that screened positive for an eligible youth were allowed to complete both adult and youth interviews. The RDD samples yielded 334 adolescent interviews from a pool of 21,224 numbers. Most of the numbers were ineligible (n=76,524) or unknown (n=44,120) and resulted in few refusals from eligible households (n=246). The targeted EWP batch was implemented later (February 28 to May 14, 2017) when it was clear that the RDD batches were not going to produce sufficient youth numbers. It produced 641 completed interviews with 505 refusals, 12,290 ineligibles and 11,929 numbers of indeterminable eligibility status.

### *Weights*

Base weights were calculated by taking the inverse sampling rate and multiplying it by the number of eligible youths over the number of telephone numbers entering the household per

stratum. Like the adult sample, strata with sample sizes less than 10 were collapsed with similar strata for variance estimation purposes (Step 1). Stratum-specific household-level nonresponse was adjusted by using the inverse strata-specific response rate. Variable weights were also trimmed at this stage by implementing a procedure outlined by Potter<sup>1</sup> (Step 2). Finally, the nonresponse adjusted weights were calibrated to estimates from the American Community Survey (ACS; 2011-2013)<sup>2</sup> on the following classifications: census region, gender, age (13-14 & 15-17), and race (White vs non-White) (Step 3). Final weights were normalized.<sup>3</sup>

### *Representativeness*

In comparing the unweighted and weighted survey estimates to the national estimates of the 2011-2015 ACS, six estimates had 95% confidence intervals that did not include the national estimate. Hispanics as well as 13 year olds, Asians, and multiracial youth were under-represented whereas 9<sup>th</sup> and 11<sup>th</sup> graders were slightly over-represented. The rest of the estimates showed good representation of the target population. Specific smoking estimates were compared to the 2016 National Youth Tobacco Survey (NYTS) for middle school only because our eligibility criterion restricted high school seniors 18 years of age or older. Our middle school estimates, however, were lower than the national average, but admittedly unstable due to the small sample size.

### *References*

1. Potter FJ. Survey of procedures to control extreme sampling weights. *Proceedings of the Section on Survey Research Methods, American Statistical Association*. 1988:453-458.
2. American Community Survey United States Census Bureau. 2012; <https://www.census.gov/programs-surveys/acs/>. Accessed May 10, 2018.
3. Flores-Cervantes I, Shapiro, G., & Brock-Roth, S. P. Effect of oversampling by poverty status in an RDD survey. *Proceedings of the Section on Survey Research Methods, American Statistical Association*. 1998:469-474.

**Supplementary Table 1.** Chemical panels

| <b>Panel</b> | <b>Chemical 1</b> | <b>Chemical 2</b> | <b>Chemical 3</b>   | <b>Chemical 4</b>   |
|--------------|-------------------|-------------------|---------------------|---------------------|
| 1            | Lead              | Toluene*          | 1-Aminonaphthalene* | Crotonaldehyde*     |
| 2            | Nicotine*         | Hydrogen cyanide  | Isoprene*           | Acrylonitrile*      |
| 3            | Formaldehyde*     | Benzo-a-pyrene*   | Napthalene          | NNK*                |
| 4            | Arsenic           | Benzene*          | Acrolein*           | 2-Aminonaphthalene* |
| 5            | Carbon monoxide*  | Uranium           | 1,3-Butadiene*      | N-nitrosornicotine* |
| 6            | Ammonia*          | Acetaldehyde*     | Nitrosamine         | 4-Aminobiphenyl*    |

N.N.K. = nicotine-derived nitrosamine ketone. \*Chemicals published on FDA's list of harmful and potentially harmful chemicals.

**Supplementary Table 2.** Description of ads asked in surveys.

| Campaign Name (Sponsor)          | Campaign Target Audience/Location                      | Ad Theme                              | Ad Description                                                                                             | Ad Launch Date        |
|----------------------------------|--------------------------------------------------------|---------------------------------------|------------------------------------------------------------------------------------------------------------|-----------------------|
| <b>Wave 1 Survey (2014-2015)</b> |                                                        |                                       |                                                                                                            |                       |
| The Real Cost (FDA)              | Youth*/National US                                     | Health consequences, cosmetic effects | A young man pulls his tooth out with pliers                                                                | Mar 2014              |
| The Real Cost (FDA)              | Youth*/National US                                     | Health consequences, cosmetic effects | A young woman pulls some skin off her face                                                                 | Feb 2014              |
| Tips from a Former Smoker (CDC)  | Adult smokers/National US                              | Health consequences                   | A woman must talk through a hole in her throat                                                             | Mar 2012              |
| The Real Cost (FDA)              | Youth*/National US                                     | Loss of control, addiction            | A tiny man bullies a teenager                                                                              | Feb 2014              |
| The Real Cost (FDA)              | Youth*/National US                                     | Loss of control, addiction            | A high school girl sits at a lunch table and talks about a bad relationship                                | Mar 2014              |
| <b>Wave 2 Survey (2016-2017)</b> |                                                        |                                       |                                                                                                            |                       |
| The Real Cost (FDA)              | Youth*/National US                                     | Loss of control, addiction            | A tiny man bullies a teenager                                                                              | Feb 2014              |
| The Real Cost (FDA)              | Youth*/National US                                     | Health consequences, chemicals        | A scary, insect-like creature appears in a high school science class or under the bleachers                | Jun 2015              |
| The Real Cost (FDA)              | Male youth*/35 rural US markets                        | Health consequences                   | About the harms of smokeless tobacco showing a young man with scars from mouth cancer                      | Apr 2016              |
| The Fresh Empire (FDA)           | Multicultural youth, hip-hop peer crowd/ 37 US markets | Social norms                          | A young person talks about rejecting smoking to keep it fresh for themselves and their family <sup>a</sup> | Oct 2015 <sup>b</sup> |
| Tips from a Former Smoker (CDC)  | Adult smokers/National US                              | Health consequences                   | A former smoker talks about their serious health problems caused by smoking <sup>a</sup>                   | Mar 2012 <sup>b</sup> |

*Note.* Youth = age 12-17; adults = age 18-54. CDC = Centers for Disease Control and Prevention. FDA = US Food and Drug Administration.

\*Youth who are open to smoking or already experimenting with cigarettes. <sup>a</sup> Description of overall campaign theme, rather than a specific ad.

<sup>b</sup> Launch date of overall campaign, rather than a specific ad.

**Supplementary Table 3.** Awareness of chemicals in cigarette smoke among adults

| Chemical           | Wave 1<br>2014-2015<br>(%) | Wave 2<br>2016-2017<br>(%) | Difference (95% CI) | <i>p</i>         |
|--------------------|----------------------------|----------------------------|---------------------|------------------|
| 1,3-Butadiene      | 8.0                        | 10.6                       | 2.6 (-2.1, 7.2)     | 0.129            |
| 1-Aminoaphthalene  | 10.7                       | 11.7                       | 1.0 (-4.9, 6.8)     | 0.756            |
| 2-Aminonaphthalene | 12.9                       | 11.0                       | -1.9 (-7.3, 3.5)    | 0.132            |
| 4-Aminobiphenyl    | 9.2                        | 9.3                        | 0.1 (-5.7, 5.9)     | 0.950            |
| Acetaldehyde       | 20.4                       | 17.2                       | -3.2 (-10.2, 3.8)   | 0.077            |
| Acrolein           | 5.9                        | 6.2                        | 0.3 (-3.8, 4.4)     | 0.439            |
| Acrylonitrile      | 9.0                        | 10.2                       | 1.1 (-4.0, 6.2)     | 0.479            |
| Ammonia            | 38.7                       | 40.0                       | 1.2 (-7.5, 10.0)    | 0.249            |
| Arsenic            | 50.1                       | 50.9                       | 0.8 (-8.4, 10.1)    | 0.186            |
| Benzene            | 39.0                       | 35.3                       | -3.6 (-12.8, 5.5)   | <b>&lt;0.001</b> |
| Benzo-a-pyrene     | 18.6                       | 23.8                       | 5.2 (-4.1, 14.5)    | 0.967            |
| Carbon monoxide    | 61.2                       | 56.1                       | -5.2 (-14.3, 3.9)   | 0.554            |
| Crotonaldehyde     | 17.5                       | 23.4                       | 5.9 (-1.3, 13.1)    | 0.448            |
| Formaldehyde       | 49.1                       | 56.5                       | 7.4 (-2.4, 17.2)    | 0.068            |
| Hydrogen cyanide   | 31.2                       | 30.1                       | -1.0 (-9.8, 7.7)    | 0.701            |
| Isoprene           | 13.3                       | 9.6                        | -3.7 (-9.5, 2.1)    | <b>0.041</b>     |
| Lead               | 22.9                       | 18.9                       | -4.0 (-10.9, 3.0)   | 0.188            |
| Napthalene         | 14.2                       | 15.4                       | 1.2 (-7.5, 9.9)     | 0.442            |
| Nicotine           | 88.7                       | 91.2                       | 2.5 (-4.5, 9.5)     | 0.222            |
| Nitrosamine        | 10.7                       | 13.7                       | 3.0 (-3.2, 9.1)     | 0.301            |
| N-nitrosornicotine | 39.1                       | 51.7                       | 12.6 (3.8, 21.4)    | <b>&lt;0.001</b> |
| N.N.K.             | 4.8                        | 4.1                        | -0.7 (-4.2, 2.7)    | 0.782            |
| Toluene            | 12.9                       | 18.3                       | 5.3 (-0.6, 11.3)    | 0.509            |
| Uranium            | 7.4                        | 8.4                        | 1.0 (-3.7, 5.6)     | 0.298            |
| Overall            | 24.9                       | 25.7                       | 0.8 (-0.9, 2.4)     | 0.192            |

*Note.* 2014-2015 *n* = 5,014; 2016-2017 *n* = 4,208. N.N.K. = nicotine-derived nitrosamine ketone. The *ns* for each chemical differ slightly but are comparable. Percentages are weighted.
